# Supplementary material for: MIG6 loss confers resistance to ALK/ROS1 inhibitors in NSCLC through EGFR activation by low-dose EGF
Source: PubMed Central journal article supplement (PMC10807714; doi:10.1172/jci.insight.173688), 2023-12-22
Supplement: jciinsight-8-173688-s032.pdf [file jciinsight-8-173688-s032.pdf]

## Supplementary Table 1

### Clinical features of biopsy samples used for RT-qPCR

| Patient ID | Biopsy ID | Diagnosis | Previous ALK-TKI | Resistance            | Biopsy sample    | Putative resistance mechanism  |
|------------|-----------|-----------|------------------|-----------------------|------------------|--------------------------------|
| JFCR-028   | 028-3     | LUAD      | Crizotinib       | Pre-alectinib         | Pleural effusion |                                |
|            | 028-5     |           | Alectinib        | Alectinib-resistance  | Pleural effusion | Unknown<br>(Activation of Src) |
| JFCR-134   | 134-1     | LUAD      | Crizotinib       | Crizotinib-resistance | EBUS-TBNA        |                                |
|            | 134-5     |           | Lorlatinib       | Lorlatinib-resistance | Left lower lung  | G1202R+L1196M                  |
| JFCR-248   | 248-1     | LUAD      | No               | Treatment naïve       | Pleural effusion |                                |
|            | 248-4     |           | Alectinib        | Alectinib-resistance  | Pleural effusion | Unknown                        |
| JFCR-276   | 276-2     | LUAD      | Alectinib        | Alectinib-resistance  | EBUS-TBNA        |                                |
|            | 276-6     |           | Lorlatinib       | Lorlatinib-resistance | Lymph node       | ALK I1171N                     |
| JFCR-426   | 426-2     | LUAD      | No               | Treatment naïve       | Pleural effusion |                                |
|            | 426-8     |           | Alectinib        | Alectinib-resistance  | Pleural effusion | Unknown                        |

LUAD; lung adenocarcinoma

EBUS-TBNA; endobronchial ultrasound-guided transbronchial needle aspiration

## Supplementary Table 2

The information of the primers using for RT-qPCR

| Primer name    | sequence                |
|----------------|-------------------------|
| EGF_Forward    | TGCGATGCCAAGCAGTCTGTGA  |
| EGF_Reverse    | GCATAGCCCAATCTGAGAACCAC |
| TGFA_Forward   | GGTCCGAAAACACTGTGAGTGG  |
| TGFA_Reverse   | CAAACCTCCTCCTCTGGGCTCTT |
| GAPDH_Forward  | TCAGCCGCATCTTCTTTTGC    |
| GAPDH_Reverse  | TTAAAAGCAGCCCTGGTGAC    |
| ERRFI1_Forward | GCGAAGGATCTGCCAGTAAG    |
| ERRFI1_Reverse | AGGTATGGTGGTCG TTCAGG   |

### Supplementary Table 3

The information of sgRNA using for knockout cell lines

| sgRNA    | Sequence             |
|----------|----------------------|
| sgMIG6-1 | CTCGGTGTGCGCGAGTTACT |
| sgMIG6-3 | AGGTTCTCTTGGCGGTACTT |
| sgNF2    | CCTGGCTTCTTACGCCGTCC |
| sgCtrl   | ACGGAGGCTAAGCGTCGCAA |
| sgEpCAM  | GTGCACCAACTGAAGTACAC |

Fig.S1

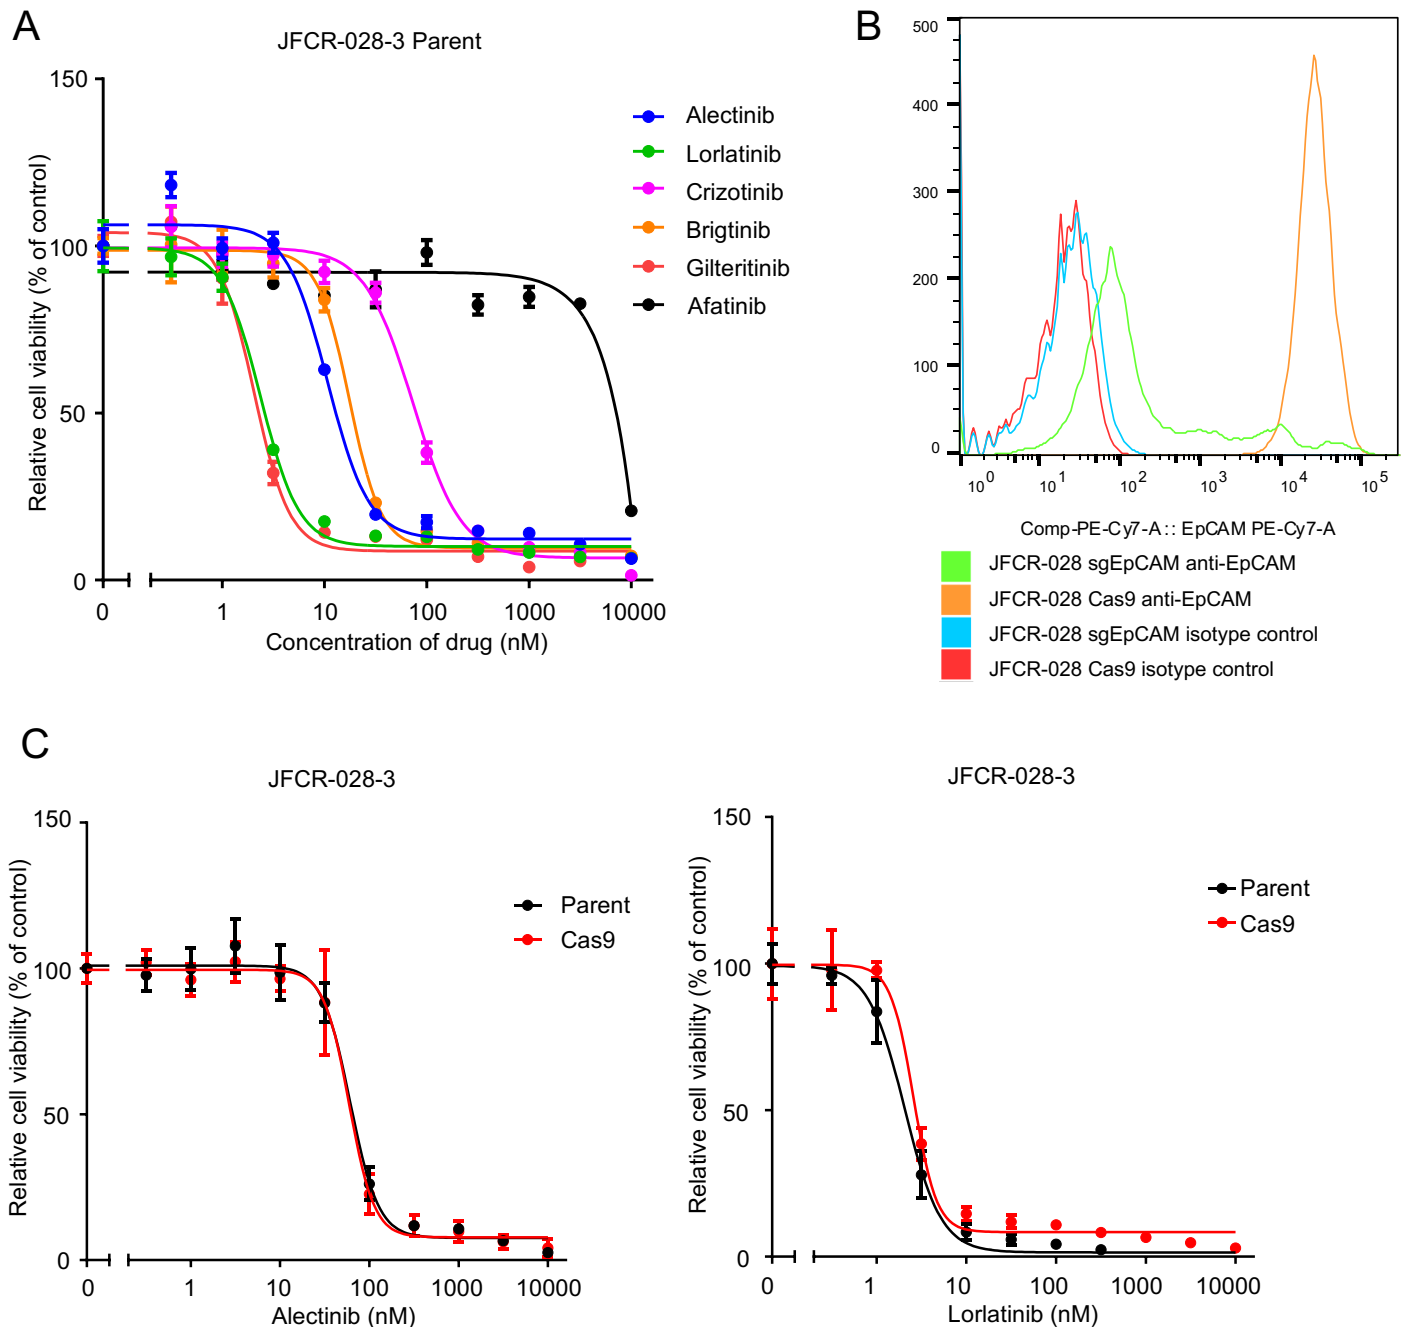

### Supplementary Figure 1

#### Characteristic of JFCR-028-3 cells

(A), JFCR-028-3 parental cells were treated with the indicated concentrations of ALK-TKIs and afatinib for 72 h. Cell viability was measured using the CellTiter-Glo assay. Each point represents the mean  $\pm$  SD of three technical replicates. (B), Flow cytometry was performed to confirm the knockout efficacy of EpCAM. (C), JFCR-028-3 parental and Cas9 stable-expressing cells were treated with the indicated concentrations of ALK-TKIs for 72 h. Cell viability was measured using the CellTiter-Glo assay. Each point represents the mean  $\pm$  SD of three replicates. (A-C), Similar experiments were performed twice and representative data are shown.

Fig.S2

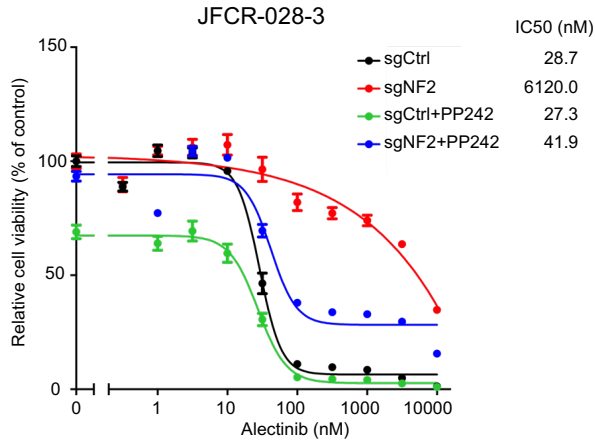

### Supplementary Figure 2

#### NF2 depletion confers resistance to alectinib

JFCR-028-3 cells were treated with the indicated concentrations of alectinib for 72 h. Cell viability was measured using the CellTiter-Glo assay ( $n = 3$ ). Each point represents the mean  $\pm$  SD of three technical replicates., Similar experiments were performed 3 times and representative data are shown.

Fig.S3

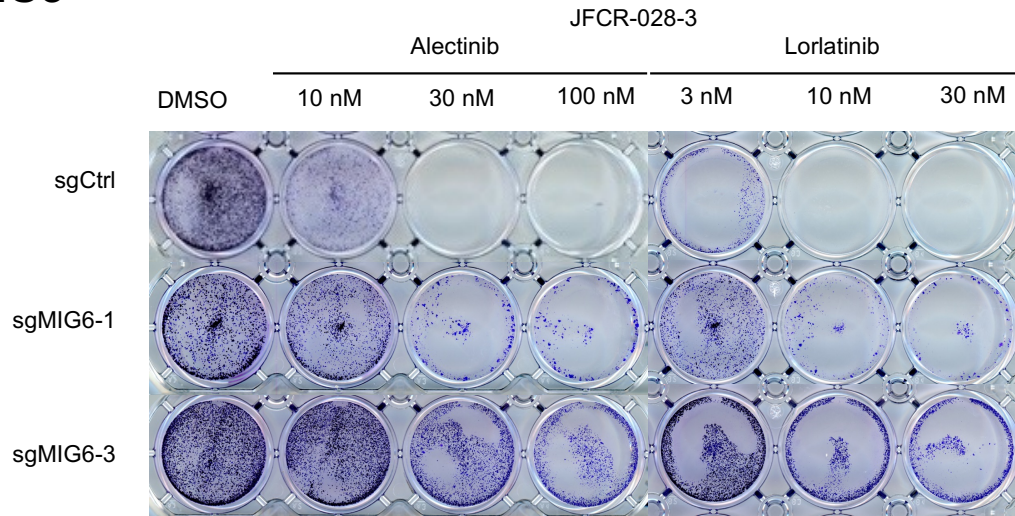

**Supplementary Figure 3**

**MIG6 depletion confers resistance to ALK-TKIs**

Colony formation assays were performed in JFCR-028-3 cells. JFCR-028-3 sg-control or sg-MIG6 cells were treated with various concentrations of alectinib or lorlatinib for 2 weeks using 3 technical replicates. Surviving cells were stained with crystal violet. Representative images are shown., Similar experiments were performed twice and representative data are shown.

Fig.S4

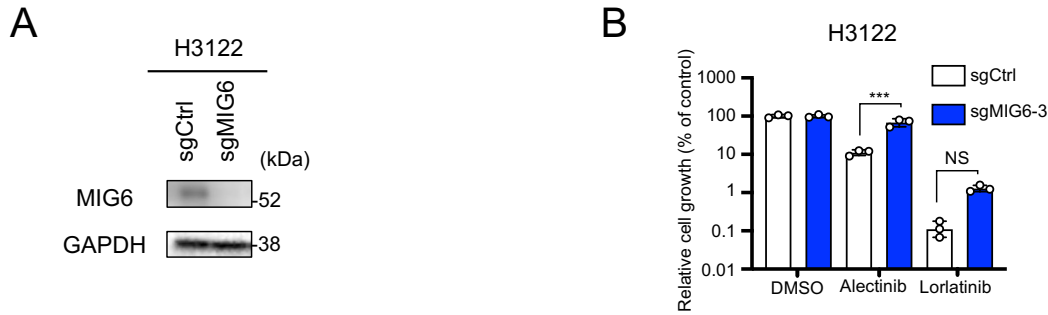

#### Supplementary Figure 4

##### MIG6 depletion in H3122 conferred resistance to ALK-TKIs

(A), immunoblot analysis of MIG6 knocked out in H3122 cells. (B), Colony formation assays were performed in H3122 cells. Each well was treated with 30 nmol/L of alectinib or 30 nmol/L of lorlatinib for 2 weeks and surviving cells were stained with crystal violet. Relative cell viability was measured using a spectrophotometer after solubilizing the stained crystal violet with an acetic acid buffer from each well. The results indicate the mean  $\pm$  SD of three technical replicates; \*\*\* $p < 0.001$  (two-way ANOVA following Dunnett's post-hoc test). (A and B), Similar experiments were performed twice, and representative data are shown.

Fig.S5

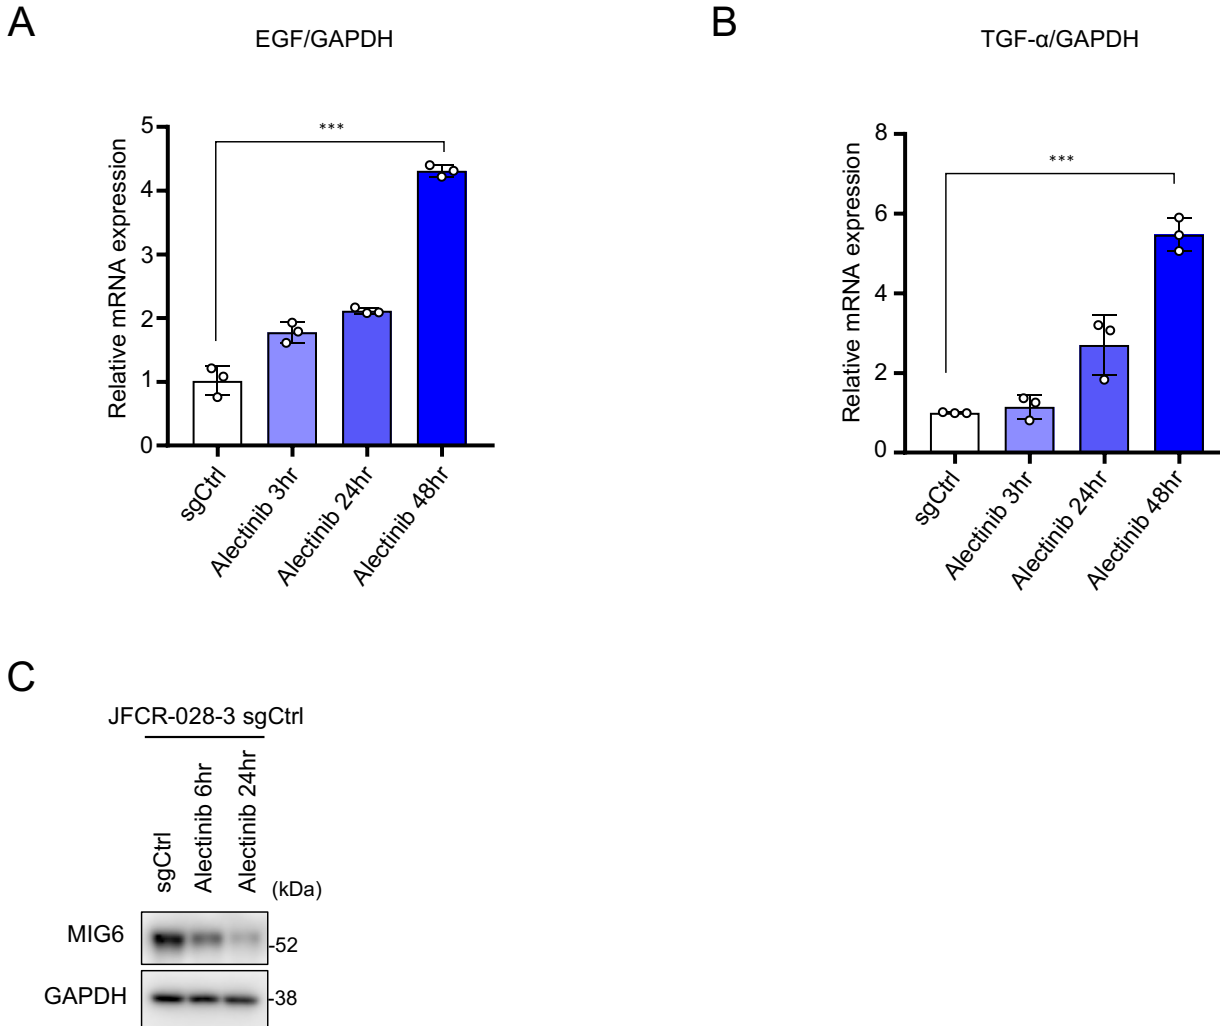

**Supplementary Figure 5**

**ALK-TKI therapy induced the increased levels of EGFR ligands**

(A and B), Quantitative RT-PCR of EGF and TGFA RNA was performed using JFCR-028-3 cells treated with 300 nmol/L of alectinib for the indicated hours. Each point represents the relative mRNA expression of MIG6/GAPDH shown as mean  $\pm$  SD of three technical replicates; \*\*\* $p < 0.001$  (two-way ANOVA following Dunnett's post-hoc test). (C), immunoblot analysis of MIG6 treated with 100 nmol/L of alectinib for the indicated hours., Similar experiments were performed 3 times and representative data are shown.



Fig.S6

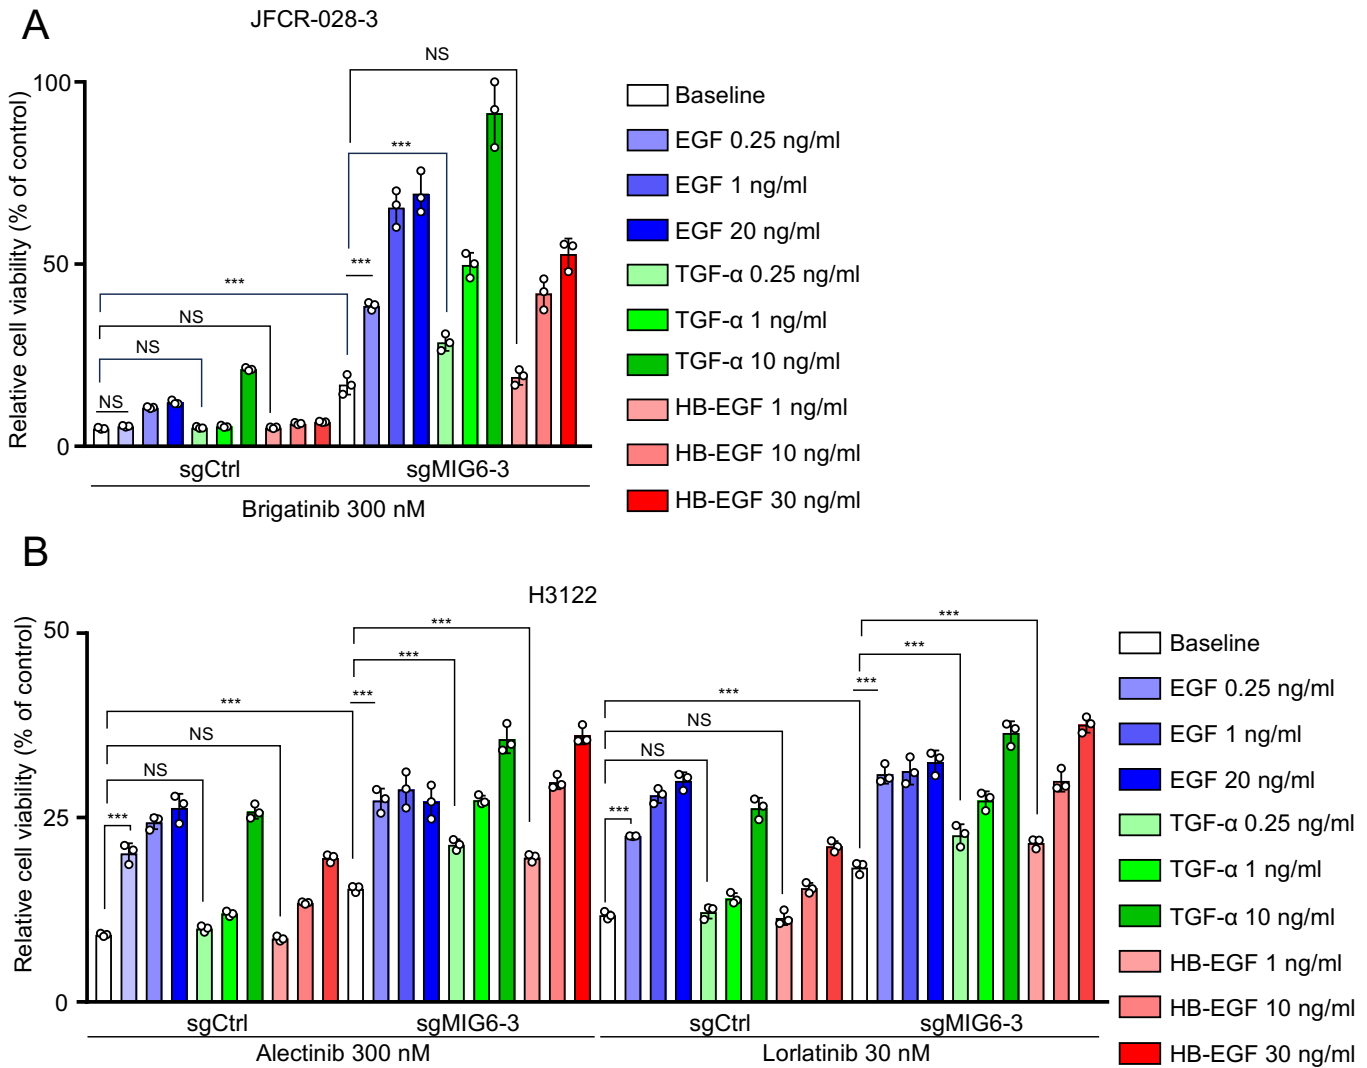

**Supplementary Figure 6**

**Low-dose EGFR ligands confer more resistance to various ALK-TKIs in MIG6-knockout cells**

JFCR-028-3 (A) or H3122 (B) cells were treated with the indicated concentrations of drugs and ligands for 72 h. Cell viability was measured using the CellTiter-Glo assay. Each point represents the mean  $\pm$  SD of three technical replicates; \*\*\* $p$  < 0.001 (two-way ANOVA following Tukey's post-hoc test). Similar experiments were performed twice and representative data are shown.

Fig.S7

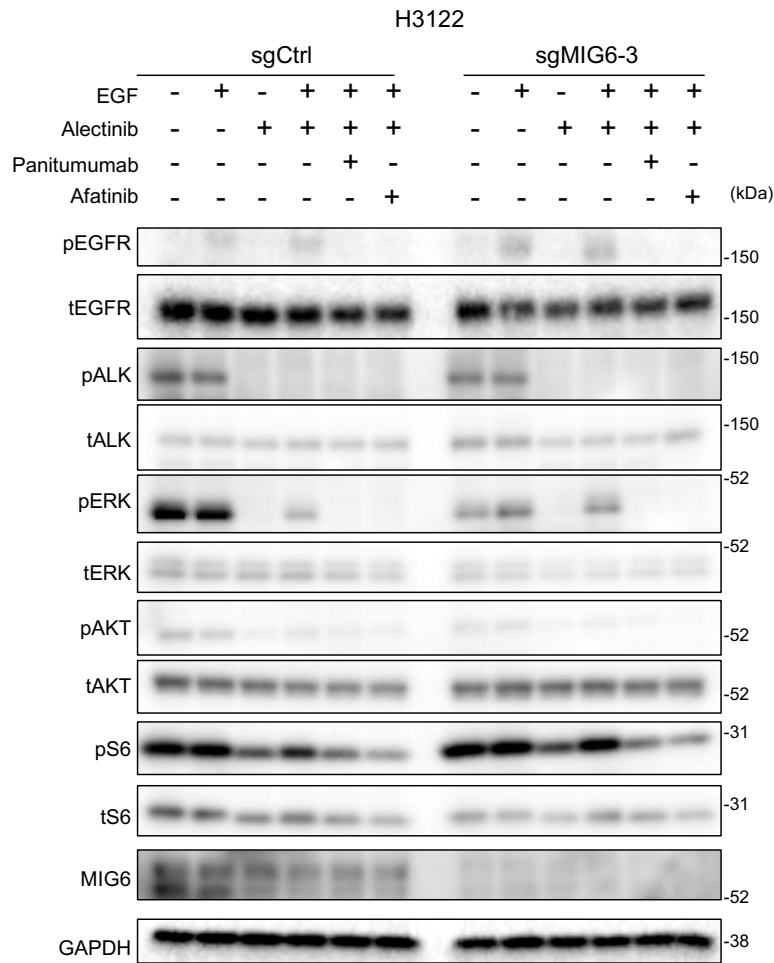

**Supplementary Figure 7**

**Combination of EGF and ALK-TKIs induced the activation of the downstream pathway of ALK in MIG6-knockout H3122 cells**

Western blotting analysis of H3122 cells treated with 300 nmol/L of alectinib, 10 µg/mL of panitumumab, 100 nmol/L of afatinib and 1 ng/mL of EGF for 3 h. Similar experiments were performed twice and representative data are shown.

**Fig.S8**

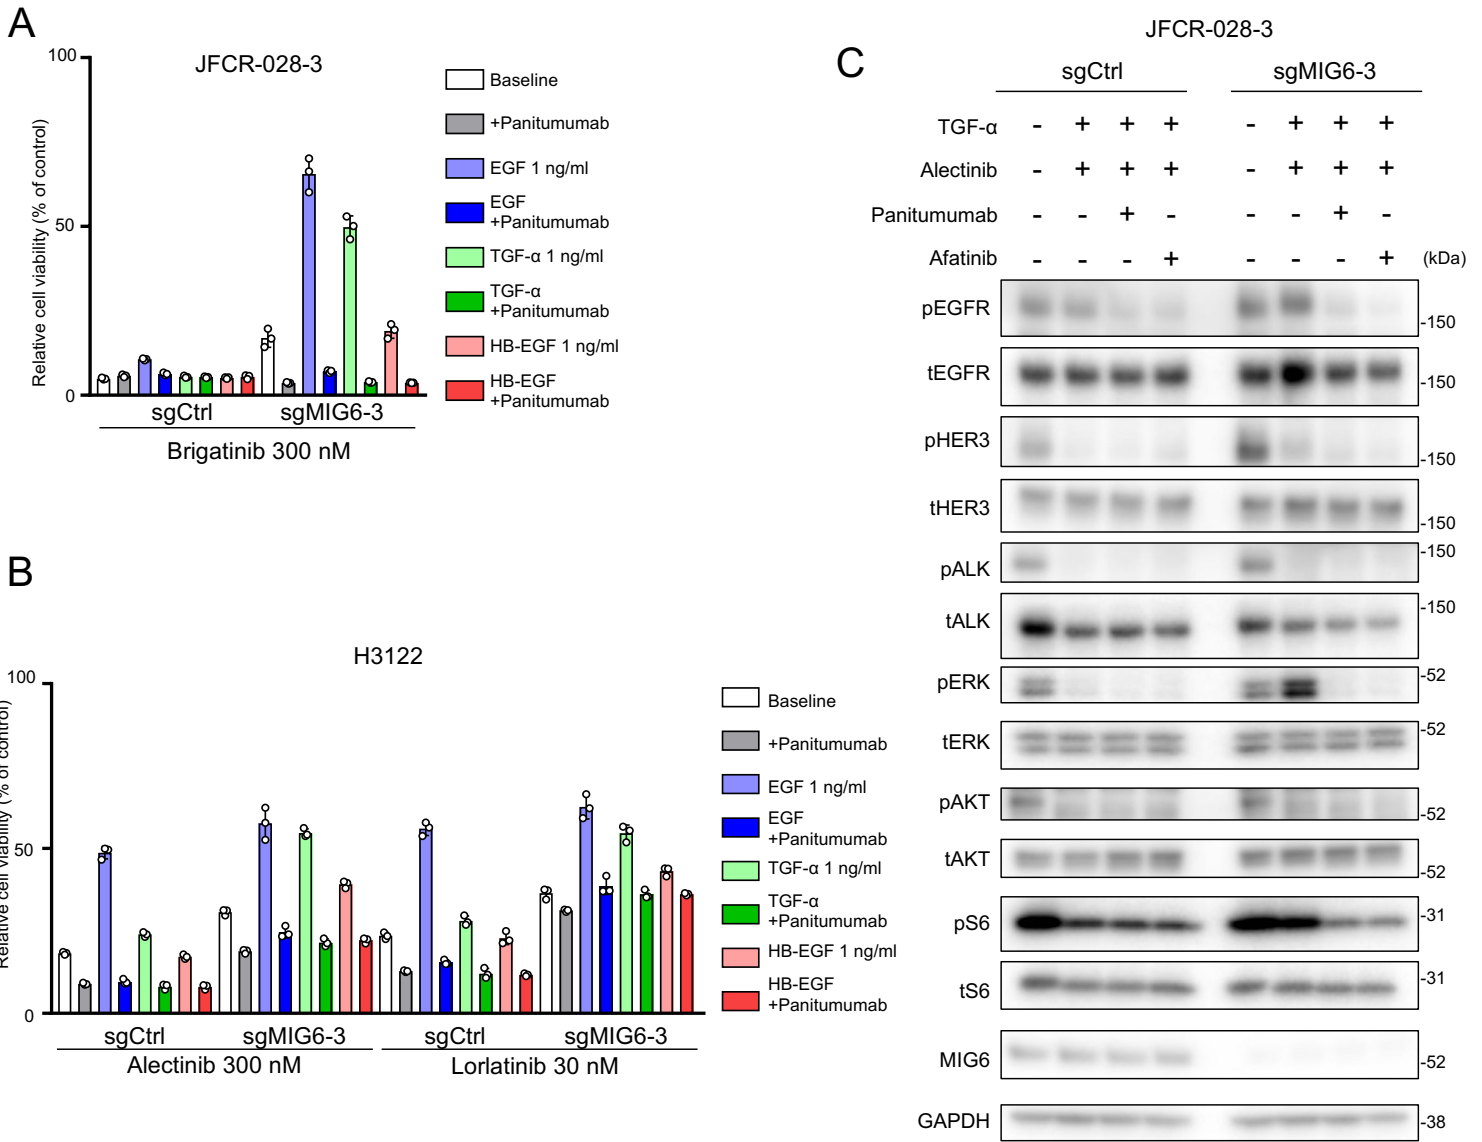

**Supplementary Figure 8**

**Combination therapy with EGFR inhibitors and various ALK-TKIs could overcome MIG6 depletion-related resistance**

(A and B), JFCR-028-3 (A) and H3122 (B) cells were treated with the indicated concentrations of ALK-TKIs and ligands with or without 10  $\mu$ g/mL of panitumumab for 72 h. Cell viability was measured using the CellTiter-Glo assay. Each point represents the mean  $\pm$  SD of three technical replicates. (C), Protein expression of the downstream pathway of ALK in JFCR-028-3 cells. Cells were treated with 300 nmol/L of alectinib, 10  $\mu$ g/mL of panitumumab, 100 nmol/L of afatinib and 1 ng/mL of TGF- $\alpha$  for 3 h. (A-C), Similar experiments were performed twice (A and B) or 3 times (C), and representative data are shown.

Fig.S9

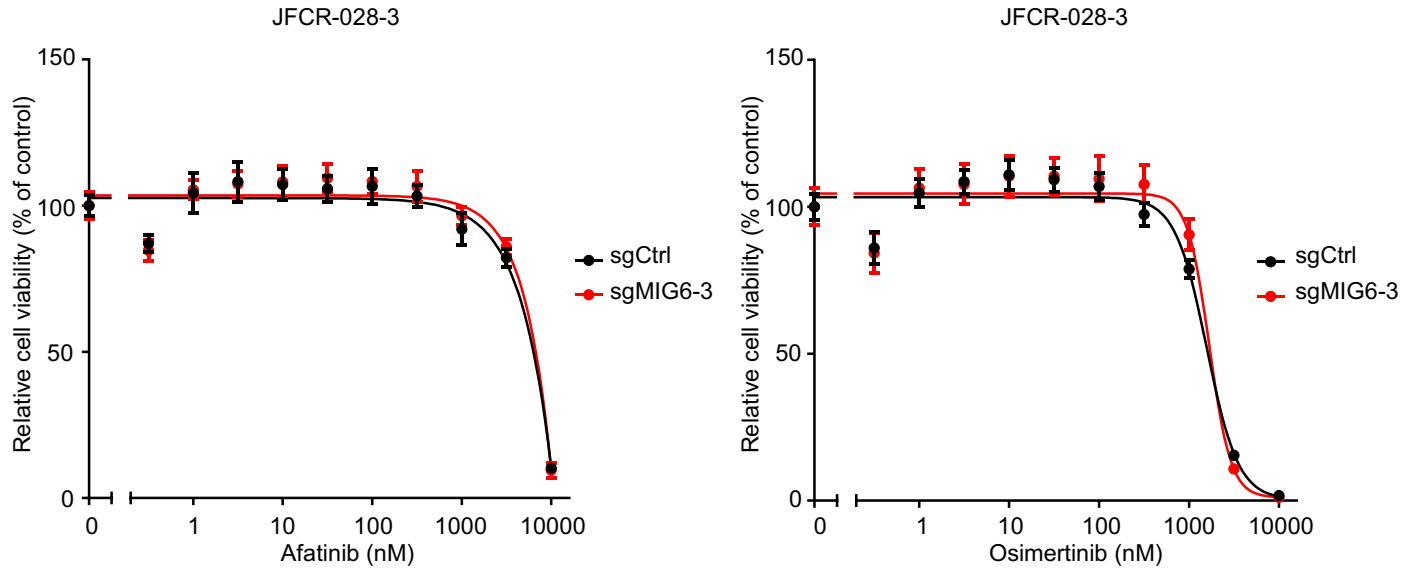

**Supplementary Figure 9**

**JFCR-028-3 MIG6-knockout cells were resistant to EGFR-TKIs.**

JFCR-028-3 cells were treated with the indicated concentrations of drugs and ligands for 72 h. Cell viability was measured using the CellTiter-Glo assay. Each point represents the mean  $\pm$  SD of three technical replicates. Similar experiments were performed twice and representative data are shown.

Fig.S10

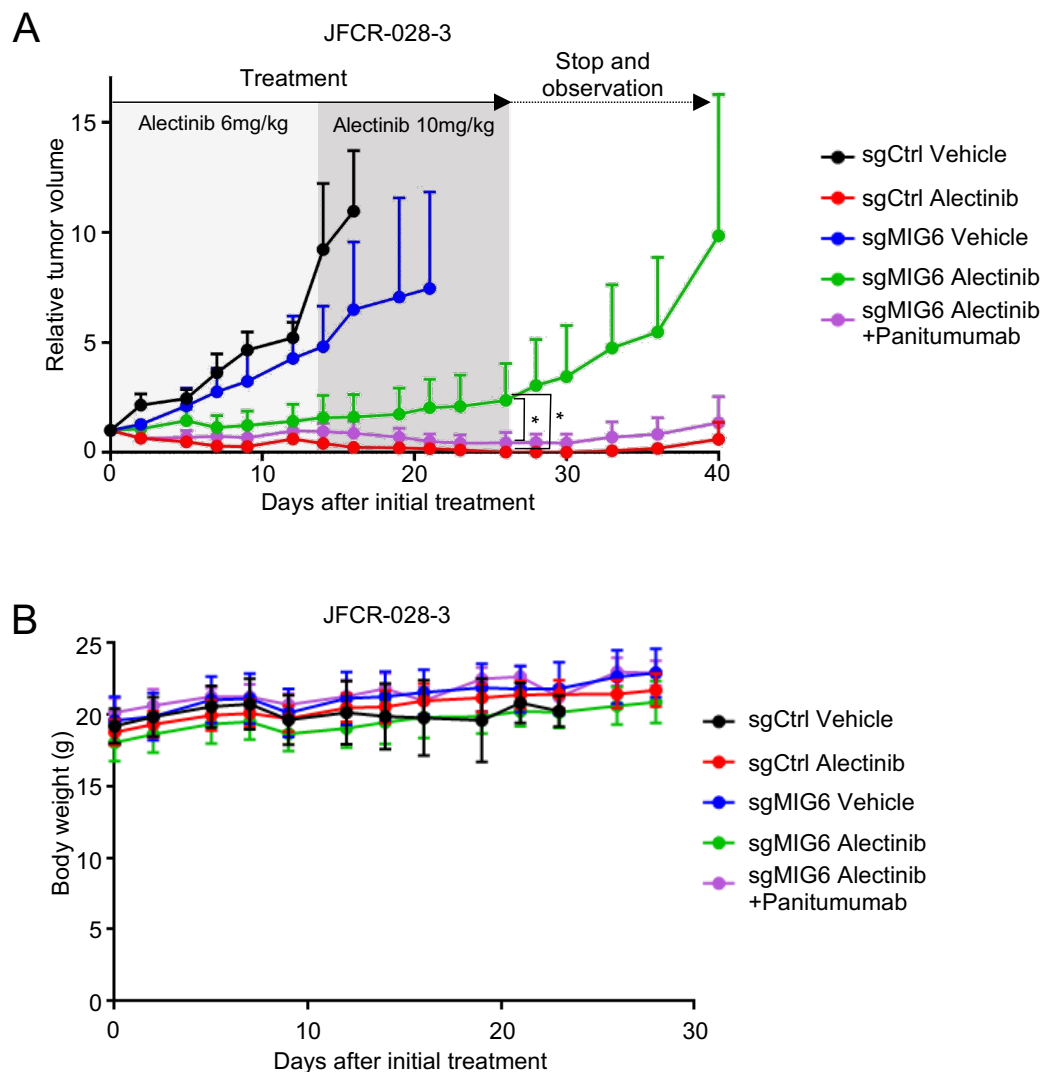

**Supplementary Figure 10**

**MIG6 depletion conferred resistance to ALK inhibitors in vivo**

(A), JFCR-028-3 control and MIG6 knockout cells were subcutaneously injected into BALB/c nude mice. The mice were treated with vehicle, alectinib (first 2week; 6 mg/kg, following 10 mg/kg) orally or alectinib plus panitumumab (0.5 mg, twice a week) intraperitoneally for 4 weeks (n = 5). Data are presented as the mean  $\pm$  SEM; \* p < 0.05 (one-way ANOVA following Dunnett's test). (B), Body weight was measured daily.

Fig.S11

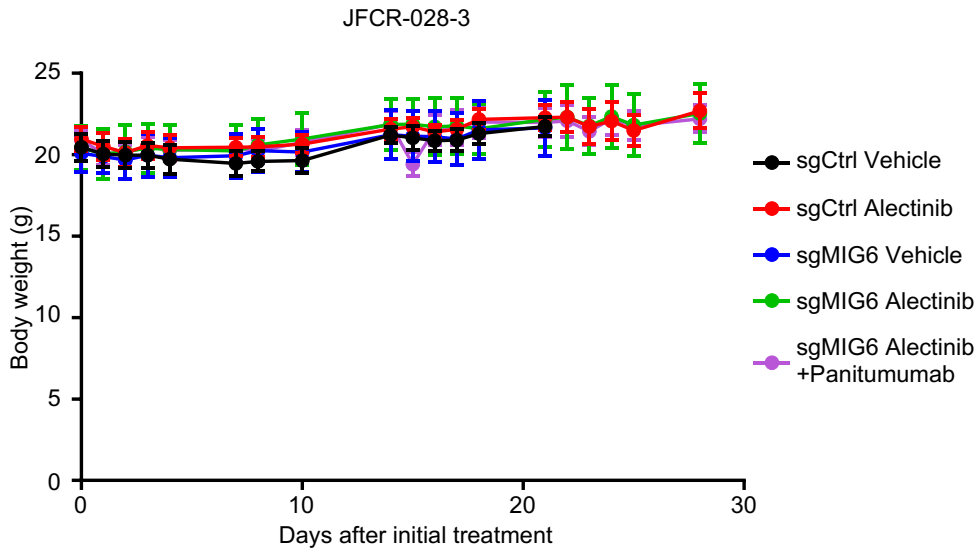

**Supplementary Figure 11**

**Combination therapy with alectinib and panitumumab did not induce severe weight loss**

JFCR-028-3 cells were subcutaneously injected into nude mice and the mice were treated with vehicle, alectinib (10 mg/kg) orally or alectinib plus panitumumab (0.5 mg, twice a week) intraperitoneally for 4 weeks (n = 6). Body weight was measured daily.

Fig.S12

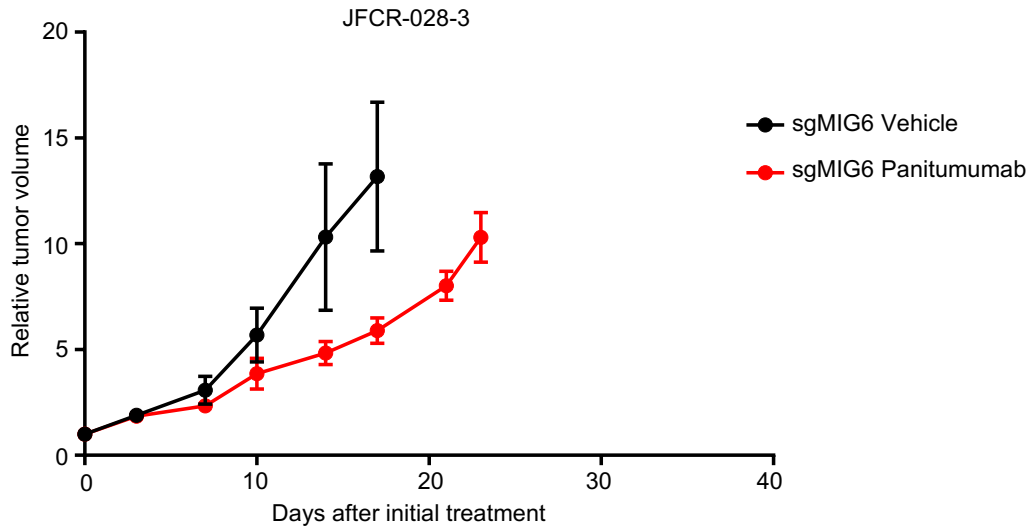

**Supplementary Figure 12**

**Panitumumab monotherapy failed to overcome the MIG6 depletion-related resistance in vivo**

JFCR-028-3 MIG6-knockout cells were subcutaneously injected into BALB/c nude mice. The mice were treated with vehicle or panitumumab (0.5 mg, twice a week) intraperitoneally for 3 weeks (n = 4). Data are presented as the mean  $\pm$  SEM.

Fig.S13

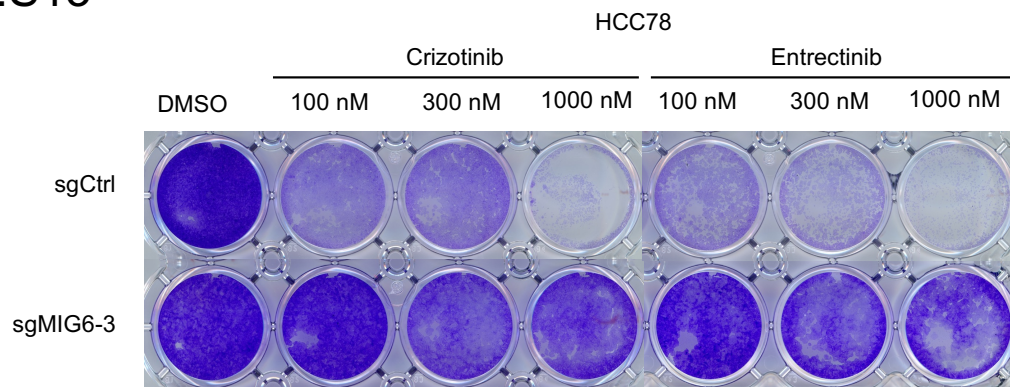

**Supplementary Figure 13**

**MIG6 depletion confers resistance to ROS1-TKIs**

Colony formation assays were performed in HCC78 cells. HCC78 sg-control or sg-MIG6 cells were treated with various concentrations of crizotinib or entrectinib for 2 weeks using 3 technical replicates. Surviving cells were stained with crystal violet. Representative images are shown., Similar experiments were performed twice and representative data are shown.



Fig.S14

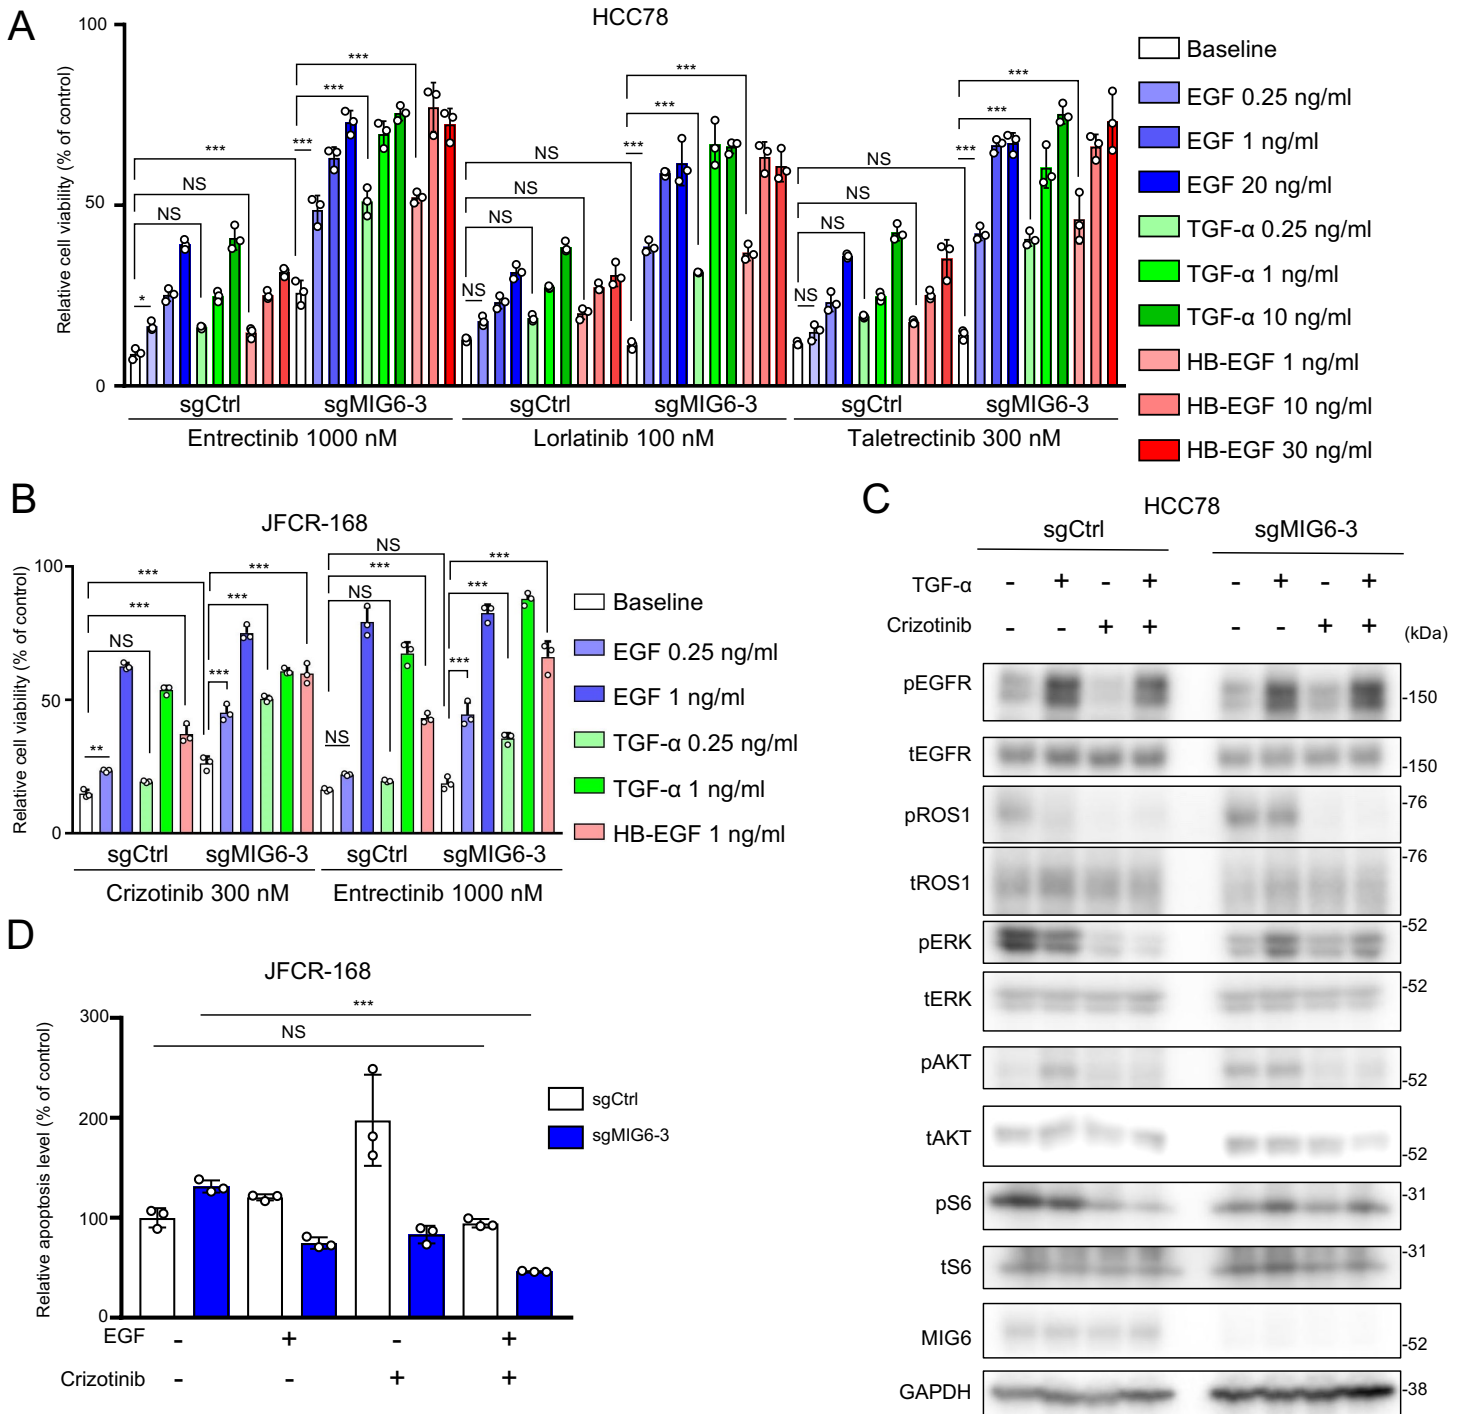

**Supplementary Figure 14**

**Low-dose EGFR ligands confer more resistance to various ROS1-TKIs in MIG6-knockout cells**

(A and B), HCC78 (A) or JFCR-168 (B) cells were treated with the indicated concentrations of drugs and ligands for 72 h. Cell viability was measured using the CellTiter-Glo assay. (C), Protein expression of the downstream pathway of ROS1 in HCC78 cells. Cells were treated with 1000 nmol/L of crizotinib for 3 h and 20 ng/mL of TGF- $\alpha$  for the indicated hours. (D), JFCR-168 cells were treated with 1000 nmol/L of crizotinib and 1 ng/mL of EGF for 48 h. Apoptosis level was measured using the Caspase-Glo assay. (A-D), Each point represents the mean  $\pm$  SD of three technical replicates; \*\*\* $p < 0.001$  (two-way ANOVA following Tukey's post-hoc test). Similar experiments were performed twice and representative data are shown.

Fig.S15

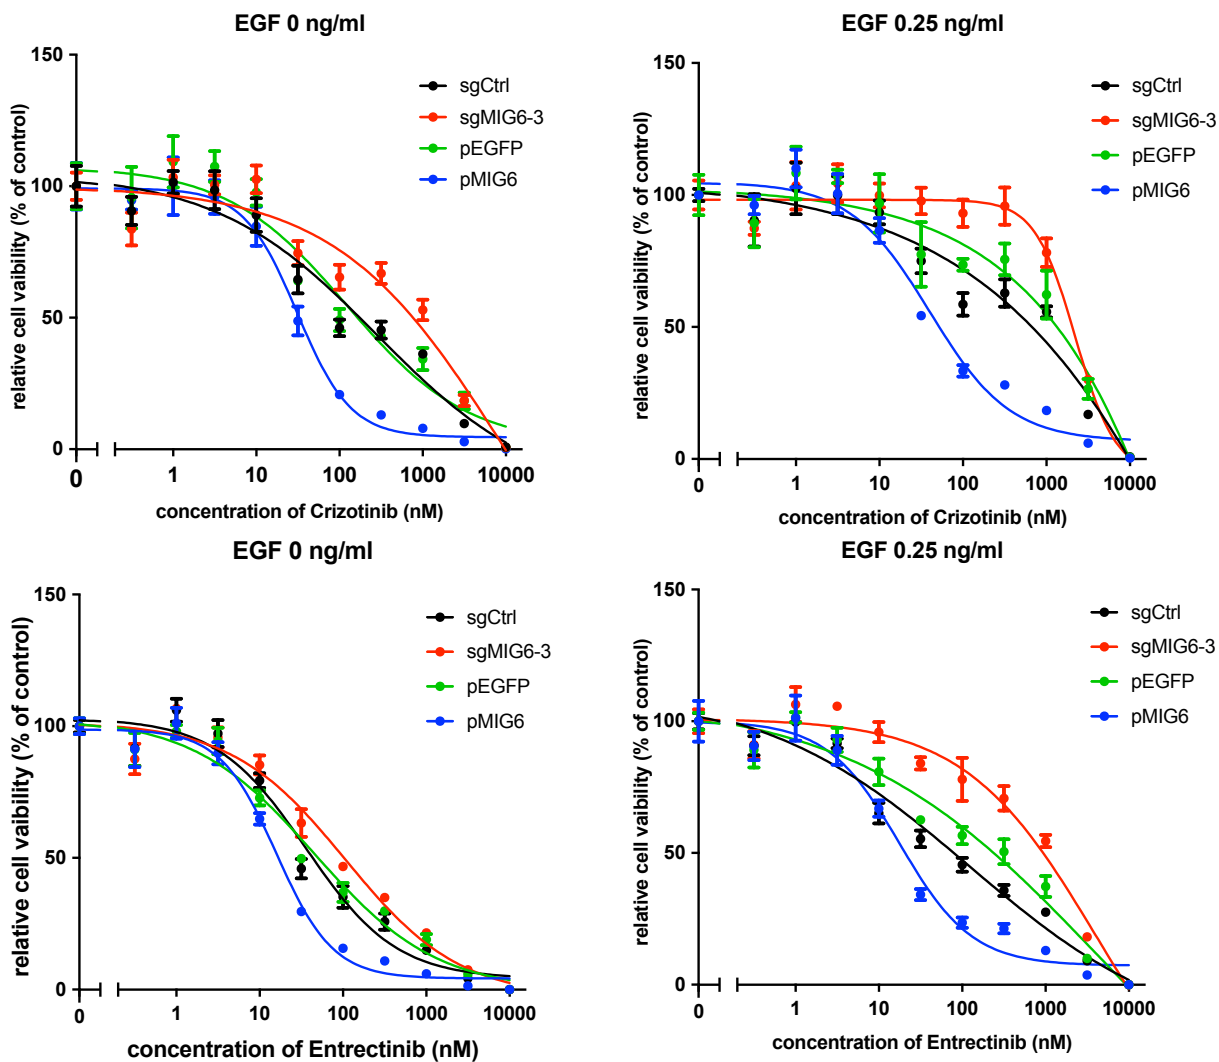

**Supplementary Figure 15**

**JFCR-168 cells could restore the sensitivity to ROS1-TKIs by MIG6 overexpression**

JFCR-168 cells were treated with the indicated concentrations of drugs and ligands for 72 h. Cell viability was measured using the CellTiter-Glo assay. Each point represents the mean  $\pm$  SD of three technical replicates. Similar experiments were performed twice and representative data are shown.

Fig.S16

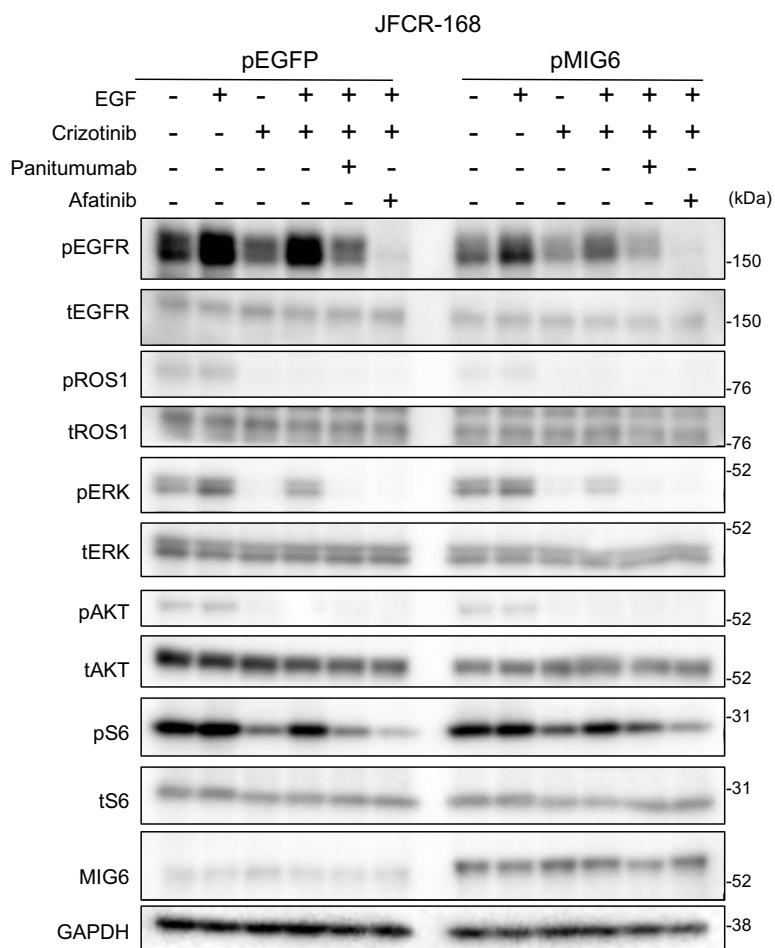

**Supplementary Figure 16**

**Combination of EGF and ROS1-TKIs suppressed the activation of the downstream pathway of ROS1 in MIG6-overexpressed JFCR-168 cells**

Western blotting analysis of JFCR-168 cells treated with 1000 nmol/L of crizotinib, 10 µg/mL of panitumumab, 100 nmol/L of afatinib and 1 ng/mL of EGF for 3 h., Similar experiments were performed twice and representative data are shown.

Fig.S17

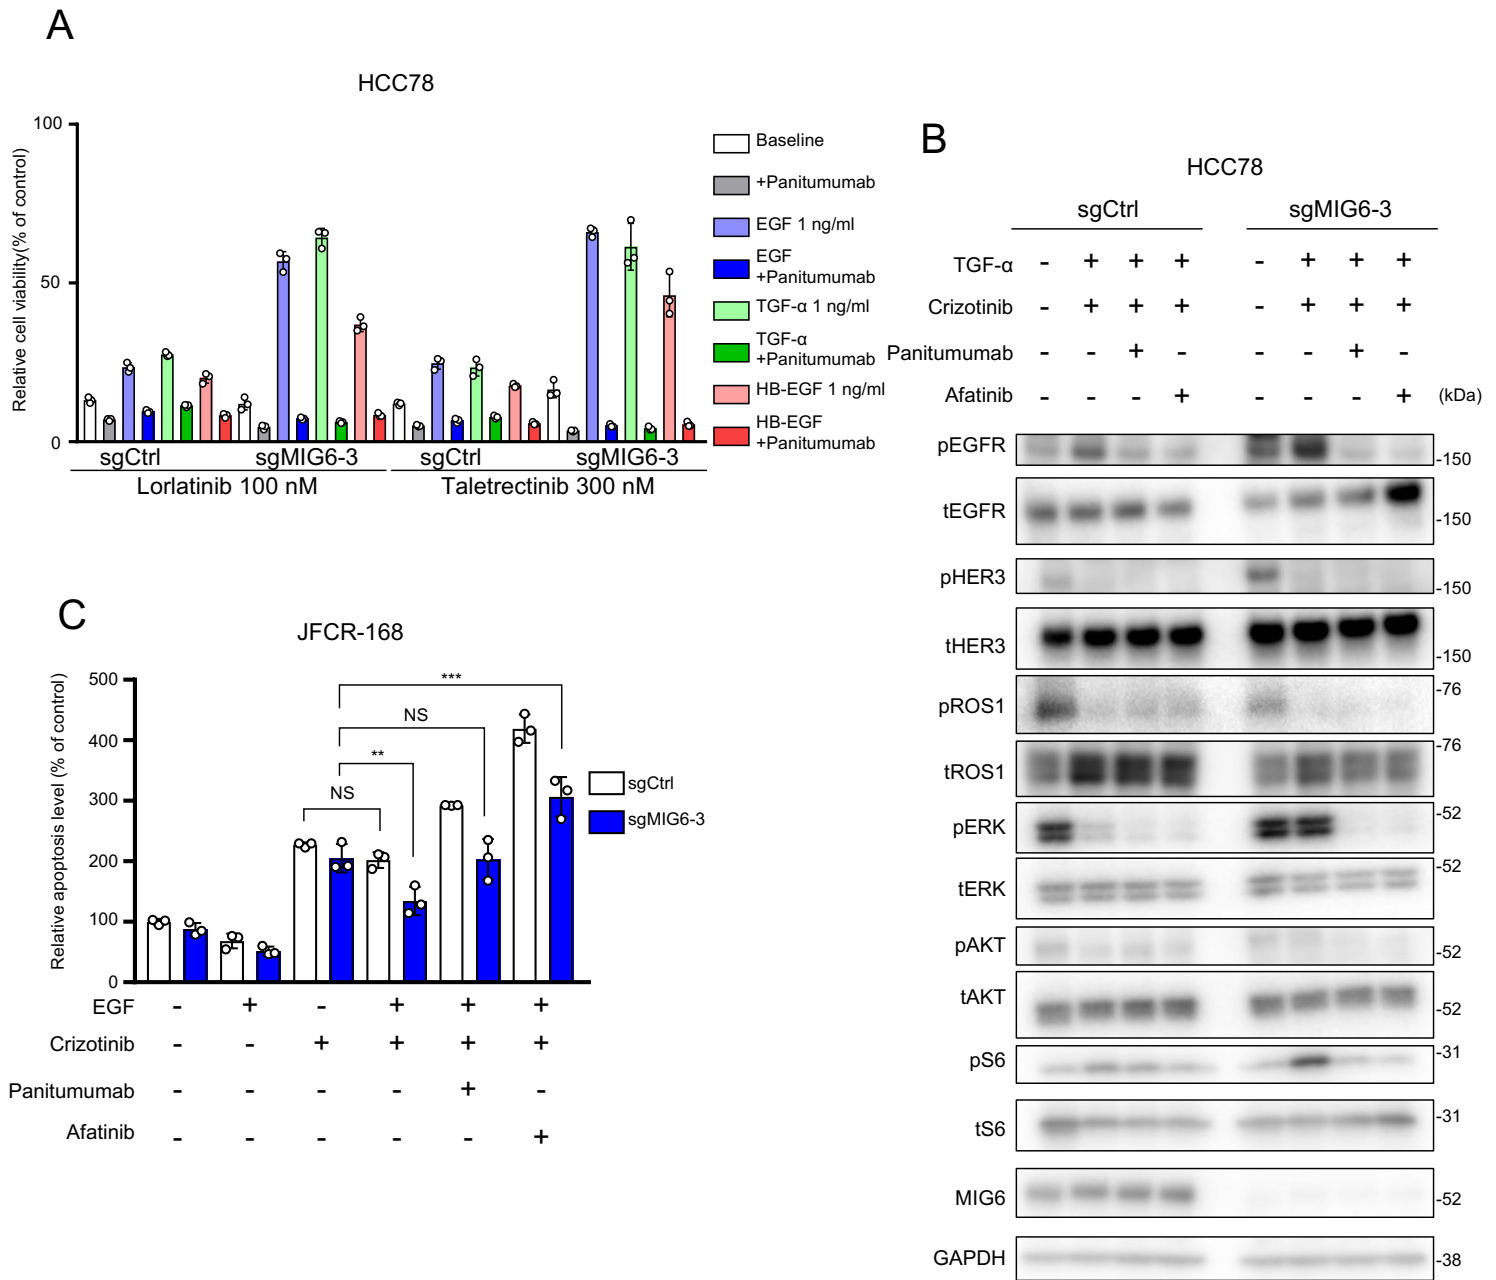

**Supplementary Figure 17**

**Combination therapy with EGFR inhibitors and various ROS1-TKIs could overcome MIG6 depletion-related resistance**

(A), HCC78 cells were treated with the indicated concentrations of ROS1-TKI and ligands with or without 10  $\mu\text{g}/\text{mL}$  of panitumumab for 72 h. Cell viability was measured using the CellTiter-Glo assay. (B), Protein expression of the downstream pathway of ROS1 in HCC78 cells. Cells were treated with 1000 nmol/L of crizotinib, 10  $\mu\text{g}/\text{mL}$  of panitumumab, 100 nmol/L of afatinib and 1 ng/mL of TGF- $\alpha$  for 3 h. (C), JFCR-168 cells were treated with 1000 nmol/L of crizotinib, 10  $\mu\text{g}/\text{mL}$  of panitumumab, 100 nmol/L of afatinib and 1 ng/mL of EGF for 48 h. Apoptosis level was measured using the Caspase-Glo assay. (A-C), Each point represents the mean  $\pm$  SD of three technical replicates; \*\* $p < 0.01$ , \*\*\* $p < 0.001$  (two-way ANOVA following Tukey's post-hoc test). Similar experiments were performed twice and representative data are shown.

Fig.S18

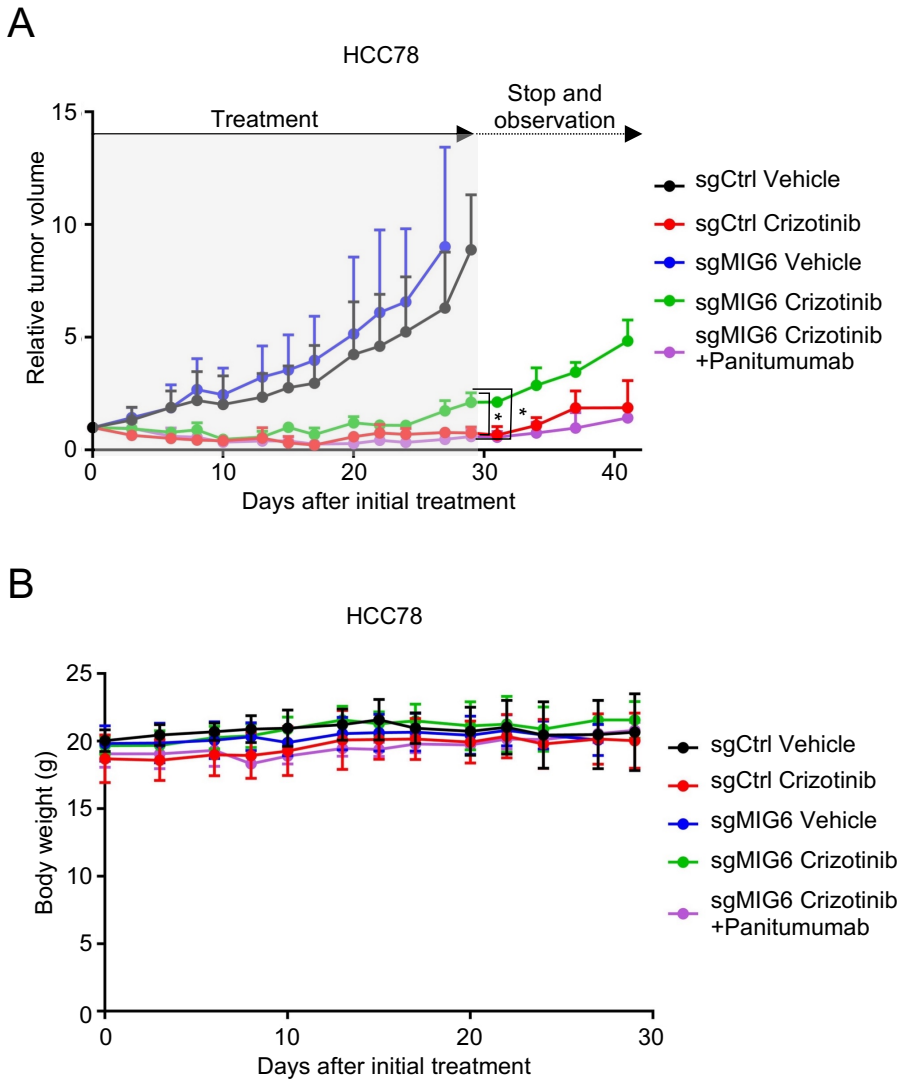

**Supplementary Figure 18**

**Antitumor effect of ROS1-TKIs in the HCC78 xenograft MIG6-depletion model**

(A), HCC78 control and MIG6-knockout cells were subcutaneously transplanted into BALB/c nude mice. The mice were treated with vehicle, crizotinib (50 mg/kg) orally or crizotinib plus panitumumab (0.5 mg, twice a week) intraperitoneally for 4 weeks (n = 3). Data are presented as mean  $\pm$  SEM; \*p < 0.05 (one-way ANOVA following Dunnett's test). (B), Body weight was measured every day.

Fig.S19

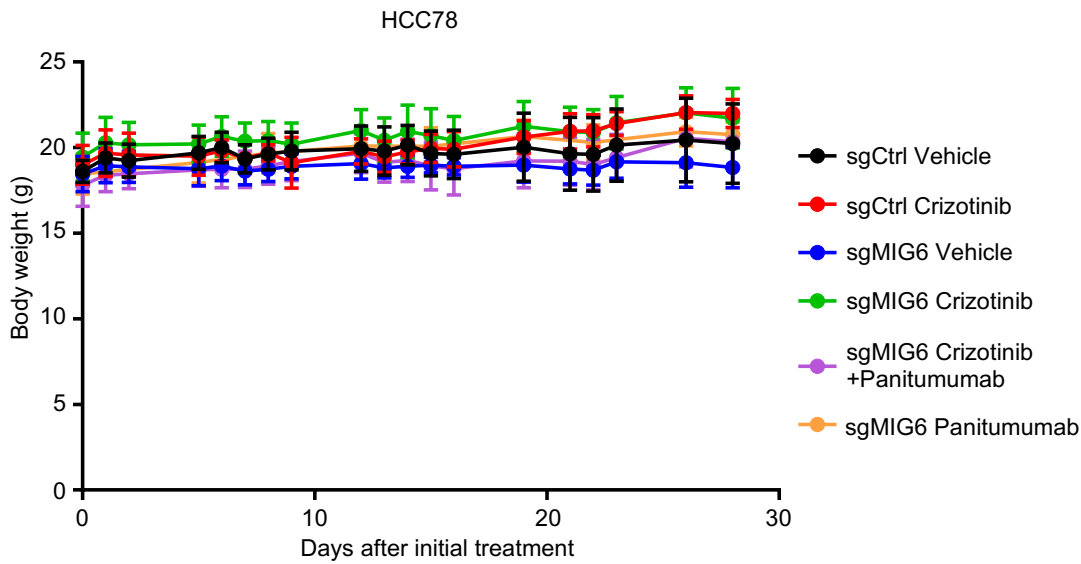

**Supplementary Figure 19**

**Combination therapy with crizotinib and panitumumab did not induce severe weight loss**

HCC78 cells were subcutaneously injected into nude mice and the mice was treated with vehicle, crizotinib (50 mg/kg) orally, panitumumab (0.5 mg, twice a week) intraperitoneally or crizotinib plus panitumumab for 4 weeks (n = 5–6). Body weight was measured daily.
